# Supplementary material for: Association between Satisfaction with Life and Personality Types A and D in Young Women with Acne Vulgaris
Source: PubMed Central journal article supplement (PMC7698541; doi:10.3390/ijerph17228524), 2020-11-17
Supplement: ijerph-17-08524-s001.pdf [file ijerph-17-08524-s001.pdf]

## SUPPLEMENTARY MATERIALS

### Study Models of the relationship between Type A and D personality and life satisfaction in young women with acne vulgaris:

Results of moderation and mediation analyses using PROCESS 3.3. software for SPSS

In: Chilicka, K.; Rogowska, A.M.; Szyguła, R.; Adamczyk, E. (2020). Association between satisfaction with life and personality type A and D in young women with acne vulgaris, *Int J Env Res Ment Health*.

### STUDY MODEL 1

Moderation effect of Type A personality on the relationship between acne severity and satisfaction with life

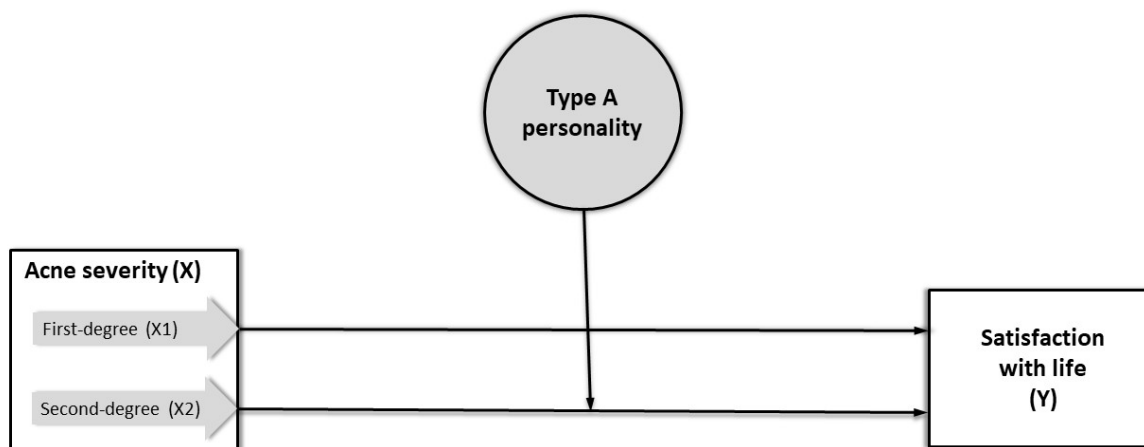

Figure S1. Study Model 1

### STUDY MODEL 1a

Type A personality as a categorical dichotomous variable

\*\*\*\*\* PROCESS Procedure for SPSS Version 3.4.1 \*\*\*\*\*  
 Written by Andrew F. Hayes, Ph.D. [www.afhayes.com](http://www.afhayes.com)  
 Documentation available in Hayes (2018). [www.guilford.com/p/hayes3](http://www.guilford.com/p/hayes3)  
 \*\*\*\*\*

Model : 1  
 Y : SWLS  
 X : HVS  
 W : TypeA  
 Sample Size: 300  
 Coding of categorical X variable for analysis:  
 HVS X1 X2  
 .000 .000 .000  
 1.000 1.000 .000

2.000 .000 1.000  
 OUTCOME VARIABLE: SWLS

Model Summary

| R    | R-sq | MSE    | F     | df1   | df2     | p    |
|------|------|--------|-------|-------|---------|------|
| .376 | .142 | 41.038 | 9.696 | 5.000 | 294.000 | .000 |

Model

|          | coeff  | se    | t      | p    | LLCI   | ULCI   |
|----------|--------|-------|--------|------|--------|--------|
| constant | 21.738 | .545  | 39.899 | .000 | 20.666 | 22.811 |
| X1       | -4.034 | .864  | -4.671 | .000 | -5.734 | -2.334 |
| X2       | -5.729 | 1.058 | -5.415 | .000 | -7.811 | -3.647 |
| TypeA    | 1.339  | 1.237 | 1.083  | .280 | -1.095 | 3.773  |
| Int_1    | 1.296  | 1.802 | .719   | .472 | -2.250 | 4.842  |
| Int_2    | -4.117 | 2.138 | -1.926 | .055 | -8.324 | .090   |

Product terms key:

Int\_1 : X1 x TypeA  
 Int\_2 : X2 x TypeA

Covariance matrix of regression parameter estimates:

|          | constant | X1    | X2    | TypeA  | Int_1  | Int_2  |
|----------|----------|-------|-------|--------|--------|--------|
| constant | .297     | -.297 | -.297 | .189   | -.189  | -.189  |
| X1       | -.297    | .746  | .297  | -.189  | -.004  | .189   |
| X2       | -.297    | .297  | 1.119 | -.189  | .189   | -.247  |
| TypeA    | .189     | -.189 | -.189 | 1.529  | -1.529 | -1.529 |
| Int_1    | -.189    | -.004 | .189  | -1.529 | 3.246  | 1.529  |
| Int_2    | -.189    | .189  | -.247 | -1.529 | 1.529  | 4.569  |

Test(s) of highest order unconditional interaction(s):

|     | R2-chng | F     | df1   | df2     | p    |
|-----|---------|-------|-------|---------|------|
| X*W | .018    | 3.162 | 2.000 | 294.000 | .044 |

-----

Focal predict: HVS (X)  
 Mod var: TypeA (W)

Conditional effects of the focal predictor at values of the moderator(s):

|                           | Effect | se    | t      | p    | LLCI   | ULCI   |
|---------------------------|--------|-------|--------|------|--------|--------|
|                           |        |       |        |      |        |        |
| Moderator value(s): TypeA |        |       |        |      |        | -.357  |
| X1                        | -4.496 | 1.078 | -4.172 | .000 | -6.617 | -2.375 |
| X2                        | -4.261 | 1.370 | -3.110 | .002 | -6.957 | -1.565 |

Test of equality of conditional means

| F      | df1   | df2     | p    |
|--------|-------|---------|------|
| 11.048 | 2.000 | 294.000 | .000 |

Estimated conditional means being compared:

HVS SWLS  
 .000 21.261  
 1.000 16.765  
 2.000 17.000

-----

|                           | Effect | se    | t      | p    | LLCI   | ULCI  |
|---------------------------|--------|-------|--------|------|--------|-------|
|                           |        |       |        |      |        |       |
| Moderator value(s): TypeA |        |       |        |      |        | .643  |
| X1                        | -3.200 | 1.444 | -2.216 | .027 | -6.041 | -.359 |

X2 -8.378 1.641 -5.106 .000 -11.607 -5.148

Test of equality of conditional means

| F      | df1   | df2     | p    |
|--------|-------|---------|------|
| 13.098 | 2.000 | 294.000 | .000 |

Estimated conditional means being compared:

| HVS   | SWLS   |
|-------|--------|
| .000  | 22.600 |
| 1.000 | 19.400 |
| 2.000 | 14.222 |

\*\*\*\*\*

\*\*\*\*\* BOOTSTRAP RESULTS FOR REGRESSION MODEL PARAMETERS \*\*\*\*\*

OUTCOME VARIABLE: SWLS

|          | Coeff  | BootMean | BootSE | BootLLCI | BootULCI |
|----------|--------|----------|--------|----------|----------|
| constant | 21.738 | 21.731   | .621   | 20.467   | 22.921   |
| X1       | -4.034 | -4.027   | .828   | -5.604   | -2.371   |
| X2       | -5.729 | -5.723   | 1.002  | -7.639   | -3.748   |
| TypeA    | 1.339  | 1.351    | 1.406  | -1.482   | 4.005    |
| Int_1    | 1.296  | 1.267    | 1.806  | -2.304   | 4.853    |
| Int_2    | -4.117 | -4.131   | 2.020  | -8.123   | -1.104   |

\*\*\*\*\* ANALYSIS NOTES AND ERRORS \*\*\*\*\*

Level of confidence for all confidence intervals in output: 95.0000

Number of bootstrap samples for percentile bootstrap confidence intervals: 10000

NOTE: The contrast option is not available with a multicategorical X.

NOTE: The following variables were mean centered prior to analysis: TypeA

## STUDY MODEL 1b

### Type A personality as a continuous variable

\*\*\*\*\* PROCESS Procedure for SPSS Version 3.4.1 \*\*\*\*\*

Written by Andrew F. Hayes, Ph.D. [www.afhayes.com](http://www.afhayes.com)

Documentation available in Hayes (2018). [www.guilford.com/p/hayes3](http://www.guilford.com/p/hayes3)

\*\*\*\*\*

Model : 1

Y : SWLS

X : HVS

W : FTAS

Sample Size: 300

Coding of categorical X variable for analysis:

| HVS   | X1    | X2    |
|-------|-------|-------|
| .000  | .000  | .000  |
| 1.000 | 1.000 | .000  |
| 2.000 | .000  | 1.000 |

\*\*\*\*\*

## OUTCOME VARIABLE: SWLS

## Model Summary

| R    | R-sq | MSE    | F      | df1   | df2     | p    |
|------|------|--------|--------|-------|---------|------|
| .392 | .153 | 40.474 | 10.652 | 5.000 | 294.000 | .000 |

## Model

|          | coeff   | se    | t      | p    | LLCI    | ULCI   |
|----------|---------|-------|--------|------|---------|--------|
| constant | 21.966  | .557  | 39.452 | .000 | 20.870  | 23.062 |
| X1       | -4.657  | .951  | -4.896 | .000 | -6.529  | -2.785 |
| X2       | -4.674  | 1.259 | -3.712 | .000 | -7.152  | -2.195 |
| FTAS     | 3.906   | 1.994 | 1.959  | .051 | -.019   | 7.832  |
| Int_1    | 3.465   | 4.868 | .712   | .477 | -6.116  | 13.046 |
| Int_2    | -18.843 | 6.746 | -2.793 | .006 | -32.119 | -5.567 |

## Product terms key:

Int\_1 : X1 x FTAS

Int\_2 : X2 x FTAS

## Covariance matrix of regression parameter estimates:

|          | constant | X1     | X2     | FTAS   | Int_1  | Int_2  |
|----------|----------|--------|--------|--------|--------|--------|
| constant | .310     | -.310  | -.310  | .400   | -.400  | -.400  |
| X1       | -.310    | .905   | .310   | -.400  | -1.448 | .400   |
| X2       | -.310    | .310   | 1.586  | -.400  | .400   | -4.274 |
| FTAS     | .400     | -.400  | -.400  | 3.978  | -3.978 | -3.978 |
| Int_1    | -.400    | -1.448 | .400   | -3.978 | 23.700 | 3.978  |
| Int_2    | -.400    | .400   | -4.274 | -3.978 | 3.978  | 45.502 |

## Test(s) of highest order unconditional interaction(s):

|     | R2-chng | F     | df1   | df2     | p    |
|-----|---------|-------|-------|---------|------|
| X*W | .026    | 4.461 | 2.000 | 294.000 | .012 |

-----

Focal predict: HVS (X)

Mod var: FTAS (W)

## Conditional effects of the focal predictor at values of the moderator(s):

Moderator value(s): FTAS -.233

| Effect | se     | t     | p      | LLCI | ULCI   |        |
|--------|--------|-------|--------|------|--------|--------|
| X1     | -5.464 | 1.693 | -3.227 | .001 | -8.797 | -2.132 |
| X2     | -.282  | 2.460 | -.114  | .909 | -5.122 | 4.559  |

## Test of equality of conditional means

| F     | df1   | df2     | p    |
|-------|-------|---------|------|
| 5.217 | 2.000 | 294.000 | .006 |

## Estimated conditional means being compared:

| HVS   | SWLS   |
|-------|--------|
| .000  | 21.055 |
| 1.000 | 15.591 |
| 2.000 | 20.774 |

-----

Moderator value(s): FTAS .000

| Effect | se     | t    | p      | LLCI | ULCI   |        |
|--------|--------|------|--------|------|--------|--------|
| X1     | -4.657 | .951 | -4.896 | .000 | -6.529 | -2.785 |

X2 -4.674 1.259 -3.712 .000 -7.152 -2.195

Test of equality of conditional means

| F      | df1   | df2     | p    |
|--------|-------|---------|------|
| 15.185 | 2.000 | 294.000 | .000 |

Estimated conditional means being compared:

| HVS   | SWLS   |
|-------|--------|
| .000  | 21.966 |
| 1.000 | 17.309 |
| 2.000 | 17.292 |

-----  
Moderator value(s): FTAS .233

| Effect | se     | t     | p      | LLCI | ULCI    |        |
|--------|--------|-------|--------|------|---------|--------|
| X1     | -3.849 | 1.232 | -3.125 | .002 | -6.273  | -1.425 |
| X2     | -9.066 | 1.437 | -6.308 | .000 | -11.894 | -6.237 |

Test of equality of conditional means

| F      | df1   | df2     | p    |
|--------|-------|---------|------|
| 20.103 | 2.000 | 294.000 | .000 |

Estimated conditional means being compared:

| HVS   | SWLS   |
|-------|--------|
| .000  | 22.876 |
| 1.000 | 19.027 |
| 2.000 | 13.811 |

\*\*\*\*\*

\*\*\*\*\* BOOTSTRAP RESULTS FOR REGRESSION MODEL PARAMETERS \*\*\*\*\*

OUTCOME VARIABLE: SWLS

|          | Coeff   | BootMean | BootSE | BootLLCI | BootULCI |
|----------|---------|----------|--------|----------|----------|
| constant | 21.966  | 21.966   | .644   | 20.695   | 23.194   |
| X1       | -4.657  | -4.704   | .934   | -6.540   | -2.845   |
| X2       | -4.674  | -4.720   | 1.213  | -7.075   | -2.264   |
| FTAS     | 3.906   | 3.943    | 2.202  | -.458    | 8.089    |
| Int_1    | 3.465   | 3.772    | 5.669  | -7.030   | 15.012   |
| Int_2    | -18.843 | -18.789  | 6.227  | -31.204  | -6.886   |

\*\*\*\*\* ANALYSIS NOTES AND ERRORS \*\*\*\*\*

Level of confidence for all confidence intervals in output: 95.0000

Number of bootstrap samples for percentile bootstrap confidence intervals: 10000

W values in conditional tables are the mean and +/- SD from the mean.

NOTE: The contrast option is not available with a multicategorical X.

NOTE: The following variables were mean centered prior to analysis: FTAS

## STUDY MODEL 2

Moderation effect of Negative Affectivity and Social Inhibition as two subcomponents of Type D personality on the relationship between acne severity and satisfaction with life: An additive approach

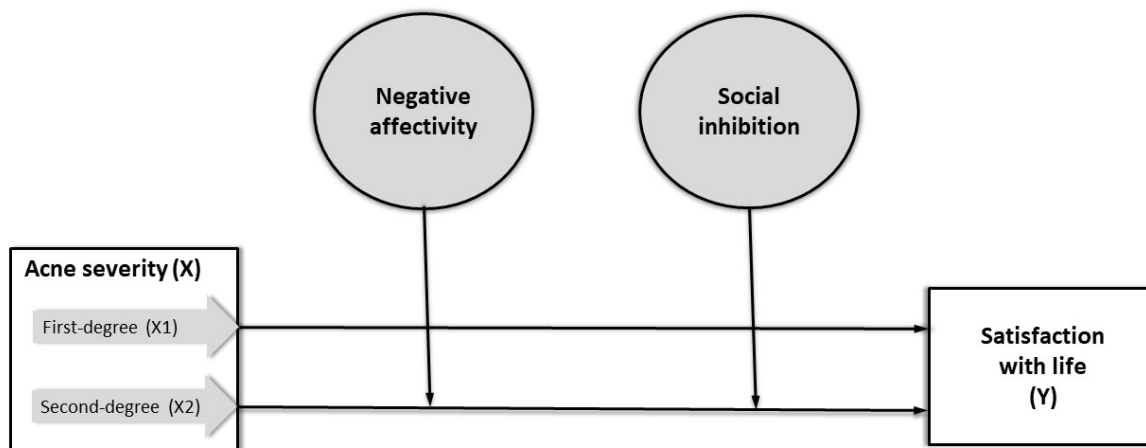

Figure S2. Study Model 2.

\*\*\*\*\* PROCESS Procedure for SPSS Version 3.4.1 \*\*\*\*\*

Written by Andrew F. Hayes, Ph.D. [www.afhayes.com](http://www.afhayes.com)

Documentation available in Hayes (2018). [www.guilford.com/p/hayes3](http://www.guilford.com/p/hayes3)

\*\*\*\*\*

Model : 2

Y : SWLS

X : HVS

W : DS14\_NE

Z : DS14\_SI

Sample Size: 300

Coding of categorical X variable for analysis:

| HVS   | X1    | X2    |
|-------|-------|-------|
| .000  | .000  | .000  |
| 1.000 | 1.000 | .000  |
| 2.000 | .000  | 1.000 |

\*\*\*\*\*

OUTCOME VARIABLE: SWLS

Model Summary

| R    | R-sq | MSE    | F      | df1   | df2     | p    |
|------|------|--------|--------|-------|---------|------|
| .468 | .219 | 37.736 | 10.181 | 8.000 | 291.000 | .000 |

Model

|          | coeff  | se    | t      | p    | LLCI   | ULCI   |
|----------|--------|-------|--------|------|--------|--------|
| constant | 20.616 | .570  | 36.185 | .000 | 19.494 | 21.737 |
| X1       | -.902  | .932  | -.968  | .334 | -2.736 | .931   |
| X2       | -4.067 | 1.272 | -3.198 | .002 | -6.570 | -1.564 |
| DS14_NE  | -.196  | .088  | -2.241 | .026 | -.368  | -.024  |
| Int_1    | -.068  | .171  | -.398  | .691 | -.404  | .268   |
| Int_2    | .194   | .311  | .622   | .535 | -.419  | .807   |
| DS14_SI  | -.148  | .100  | -1.477 | .141 | -.345  | .049   |
| Int_3    | -.350  | .177  | -1.974 | .049 | -.699  | -.001  |
| Int_4    | -.110  | .261  | -.422  | .673 | -.625  | .404   |

## Product terms key:

Int\_1 : X1 x DS14\_NE  
 Int\_2 : X2 x DS14\_NE  
 Int\_3 : X1 x DS14\_SI  
 Int\_4 : X2 x DS14\_SI

## Covariance matrix of regression parameter estimates:

|          | constant | X1    | X2    | DS14_NE | Int_1 | Int_2 | DS14_SI | Int_3 | Int_4 |
|----------|----------|-------|-------|---------|-------|-------|---------|-------|-------|
| constant | .325     | -.325 | -.325 | .012    | -.012 | -.012 | .015    | -.015 | -.015 |
| X1       | -.325    | .868  | .325  | -.012   | -.026 | .012  | -.015   | -.011 | .015  |
| X2       | -.325    | .325  | 1.617 | -.012   | .012  | -.124 | -.015   | .015  | -.016 |
| DS14_NE  | .012     | -.012 | -.012 | .008    | -.008 | -.008 | -.004   | .004  | .004  |
| Int_1    | -.012    | -.026 | .012  | -.008   | .029  | .008  | .004    | -.012 | -.004 |
| Int_2    | -.012    | .012  | -.124 | -.008   | .008  | .097  | .004    | -.004 | -.054 |
| DS14_SI  | .015     | -.015 | -.015 | -.004   | .004  | .004  | .010    | -.010 | -.010 |
| Int_3    | -.015    | -.011 | .015  | .004    | -.012 | -.004 | -.010   | .031  | .010  |
| Int_4    | -.015    | .015  | -.016 | .004    | -.004 | -.054 | -.010   | .010  | .068  |

## Test(s) of highest order unconditional interaction(s):

|      | R2-chng | F     | df1   | df2     | p    |
|------|---------|-------|-------|---------|------|
| X*W  | .002    | .315  | 2.000 | 291.000 | .730 |
| X*Z  | .010    | 1.949 | 2.000 | 291.000 | .144 |
| BOTH | .017    | 1.556 | 4.000 | 291.000 | .186 |

\*\*\*\*\*

## \*\*\*\*\* BOOTSTRAP RESULTS FOR REGRESSION MODEL PARAMETERS \*\*\*\*\*

## OUTCOME VARIABLE: SWLS

|          | Coeff  | BootMean | BootSE | BootLLCI | BootULCI |
|----------|--------|----------|--------|----------|----------|
| constant | 20.616 | 20.611   | .677   | 19.285   | 21.944   |
| X1       | -.902  | -.972    | .932   | -2.836   | .822     |
| X2       | -4.067 | -3.989   | 1.419  | -6.595   | -1.107   |
| DS14_NE  | -.196  | -.195    | .106   | -.398    | .022     |
| Int_1    | -.068  | -.055    | .188   | -.407    | .330     |
| Int_2    | .194   | .174     | .358   | -.552    | .870     |
| DS14_SI  | -.148  | -.149    | .111   | -.374    | .063     |
| Int_3    | -.350  | -.347    | .169   | -.683    | -.022    |
| Int_4    | -.110  | -.093    | .244   | -.569    | .400     |

## \*\*\*\*\* ANALYSIS NOTES AND ERRORS \*\*\*\*\*

Level of confidence for all confidence intervals in output: 95.0000

Number of bootstrap samples for percentile bootstrap confidence intervals: 10000

NOTE: The contrast option is not available with a multicategorical X.

NOTE: The following variables were mean centered prior to analysis: DS14\_NE DS14\_SI

### STUDY MODEL 3

Moderation effect of Negative Affectivity and Social Inhibition as two subcomponents of Type D personality on the relationship between acne severity and satisfaction with life: A synergistic approach

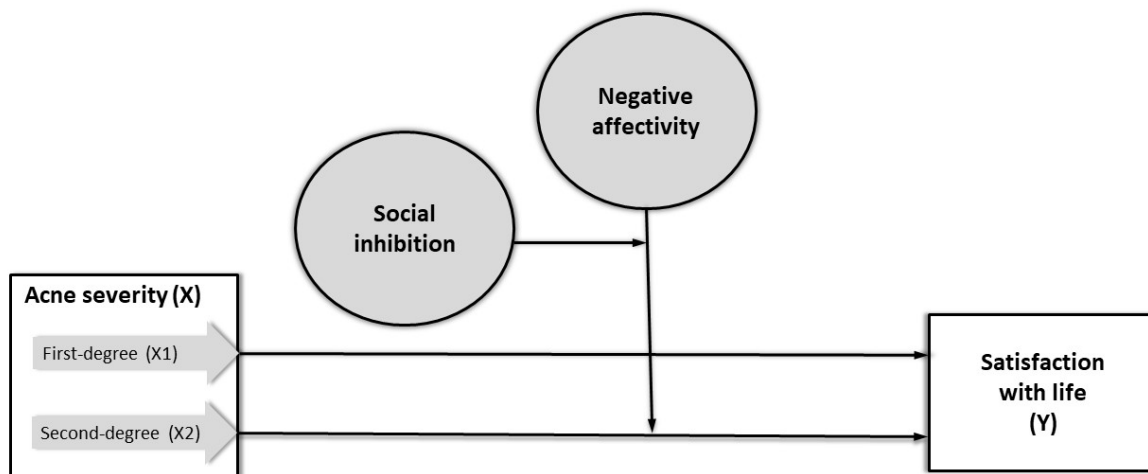

Figure S3. Study Model 3.

\*\*\*\*\* PROCESS Procedure for SPSS Version 3.4.1 \*\*\*\*\*

Written by Andrew F. Hayes, Ph.D. [www.afhayes.com](http://www.afhayes.com)

Documentation available in Hayes (2018). [www.guilford.com/p/hayes3](http://www.guilford.com/p/hayes3)

\*\*\*\*\*

Model : 3

Y : SWLS

X : HVS

W : DS14\_NE

Z : DS14\_SI

Sample Size: 300

Coding of categorical X variable for analysis:

HVS X1 X2

.000 .000 .000

1.000 1.000 .000

2.000 .000 1.000

\*\*\*\*\*

OUTCOME VARIABLE: SWLS

Model Summary

| R    | R-sq | MSE    | F     | df1    | df2     | p    |
|------|------|--------|-------|--------|---------|------|
| .475 | .225 | 37.803 | 7.617 | 11.000 | 288.000 | .000 |

Model

|          | coeff  | se    | t      | p    | LLCI   | ULCI   |
|----------|--------|-------|--------|------|--------|--------|
| constant | 20.608 | .623  | 33.059 | .000 | 19.381 | 21.835 |
| X1       | -1.158 | .987  | -1.173 | .242 | -3.100 | .784   |
| X2       | -3.791 | 1.333 | -2.844 | .005 | -6.414 | -1.167 |
| DS14_NE  | -.195  | .095  | -2.049 | .041 | -.382  | -.008  |
| Int_1    | -.071  | .175  | -.408  | .684 | -.415  | .273   |



|         |       |      |        |      |       |       |
|---------|-------|------|--------|------|-------|-------|
| Int_2   | .267  | .325 | .822   | .412 | -.373 | .908  |
| DS14_SI | -.148 | .101 | -1.475 | .141 | -.346 | .050  |
| Int_3   | -.409 | .183 | -2.231 | .026 | -.769 | -.048 |
| Int_4   | .034  | .309 | .110   | .912 | -.574 | .642  |
| Int_5   | .000  | .014 | .032   | .974 | -.027 | .028  |
| Int_6   | .030  | .027 | 1.103  | .271 | -.024 | .084  |
| Int_7   | -.041 | .048 | -.849  | .396 | -.136 | .054  |

## Product terms key:

|       |   |         |   |                   |
|-------|---|---------|---|-------------------|
| Int_1 | : | X1      | x | DS14_NE           |
| Int_2 | : | X2      | x | DS14_NE           |
| Int_3 | : | X1      | x | DS14_SI           |
| Int_4 | : | X2      | x | DS14_SI           |
| Int_5 | : | DS14_NE | x | DS14_SI           |
| Int_6 | : | X1      | x | DS14_NE x DS14_SI |
| Int_7 | : | X2      | x | DS14_NE x DS14_SI |

## Covariance matrix of regression parameter estimates:

|          | constant | X1    | X2    | DS14_NE | Int_1 | Int_2 | DS14_SI | Int_3 | Int_4 | Int_5 | Int_6 |
|----------|----------|-------|-------|---------|-------|-------|---------|-------|-------|-------|-------|
| constant | .389     | -.389 | -.389 | .002    | -.002 | -.002 | .017    | -.017 | -.017 | -.004 | .004  |
| X1       | -.389    | .973  | .389  | -.002   | -.036 | .002  | -.017   | .000  | .017  | .004  | -.008 |
| X2       | -.389    | .389  | 1.777 | -.002   | .002  | -.108 | -.017   | .017  | .036  | .004  | -.004 |
| DS14_NE  | .002     | -.002 | -.002 | .009    | -.009 | -.009 | -.004   | .004  | .004  | .001  | -.001 |
| Int_1    | -.002    | -.036 | .002  | -.009   | .031  | .009  | .004    | -.012 | -.004 | -.001 | .000  |
| Int_2    | -.002    | .002  | -.108 | -.009   | .009  | .106  | .004    | -.004 | -.041 | -.001 | .001  |
| DS14_SI  | .017     | -.017 | -.017 | -.004   | .004  | .004  | .010    | -.010 | -.010 | .000  | .000  |
| Int_3    | -.017    | .000  | .017  | .004    | -.012 | -.004 | -.010   | .034  | .010  | .000  | -.001 |
| Int_4    | -.017    | .017  | .036  | .004    | -.004 | -.041 | -.010   | .010  | .095  | .000  | .000  |
| Int_5    | -.004    | .004  | .004  | .001    | -.001 | -.001 | .000    | .000  | .000  | .000  | .000  |
| Int_6    | .004     | -.008 | -.004 | -.001   | .000  | .001  | .000    | -.001 | .000  | .000  | .001  |
| Int_7    | .004     | -.004 | -.018 | -.001   | .001  | -.003 | .000    | .000  | -.008 | .000  | .000  |

## Test(s) of highest order unconditional interaction(s):

|       | R2-chng | F     | df1   | df2     | p    |
|-------|---------|-------|-------|---------|------|
| X*W*Z | .006    | 1.137 | 2.000 | 288.000 | .322 |

\*\*\*\*\*

\*\*\*\*\* BOOTSTRAP RESULTS FOR REGRESSION MODEL PARAMETERS \*\*\*\*\*

## OUTCOME VARIABLE: SWLS

|          | Coeff  | BootMean | BootSE | BootLLCI | BootULCI |
|----------|--------|----------|--------|----------|----------|
| constant | 20.608 | 20.598   | .733   | 19.141   | 22.024   |
| X1       | -1.158 | -1.229   | .970   | -3.147   | .670     |
| X2       | -3.791 | -3.779   | 1.419  | -6.470   | -.893    |
| DS14_NE  | -.195  | -.188    | .122   | -.416    | .069     |
| Int_1    | -.071  | -.058    | .201   | -.432    | .354     |
| Int_2    | .267   | .242     | .396   | -.568    | .994     |
| DS14_SI  | -.148  | -.153    | .114   | -.382    | .067     |
| Int_3    | -.409  | -.399    | .173   | -.735    | -.056    |
| Int_4    | .034   | .052     | .269   | -.472    | .596     |
| Int_5    | .000   | .001     | .018   | -.034    | .038     |
| Int_6    | .030   | .027     | .027   | -.032    | .076     |
| Int_7    | -.041  | -.039    | .044   | -.129    | .049     |

\*\*\*\*\* ANALYSIS NOTES AND ERRORS \*\*\*\*\*

Level of confidence for all confidence intervals in output: 95.0000

Number of bootstrap samples for percentile bootstrap confidence intervals: 10000

NOTE: The contrast option is not available with a multicategorical X.

NOTE: The following variables were mean centered prior to analysis: DS14\_NE DS14\_SI

### STUDY MODEL 4

**Mediation effect of Negative Affectivity and Social Inhibition as two subcomponents of Type D personality on the relationship between acne severity and satisfaction with life: An additive approach**

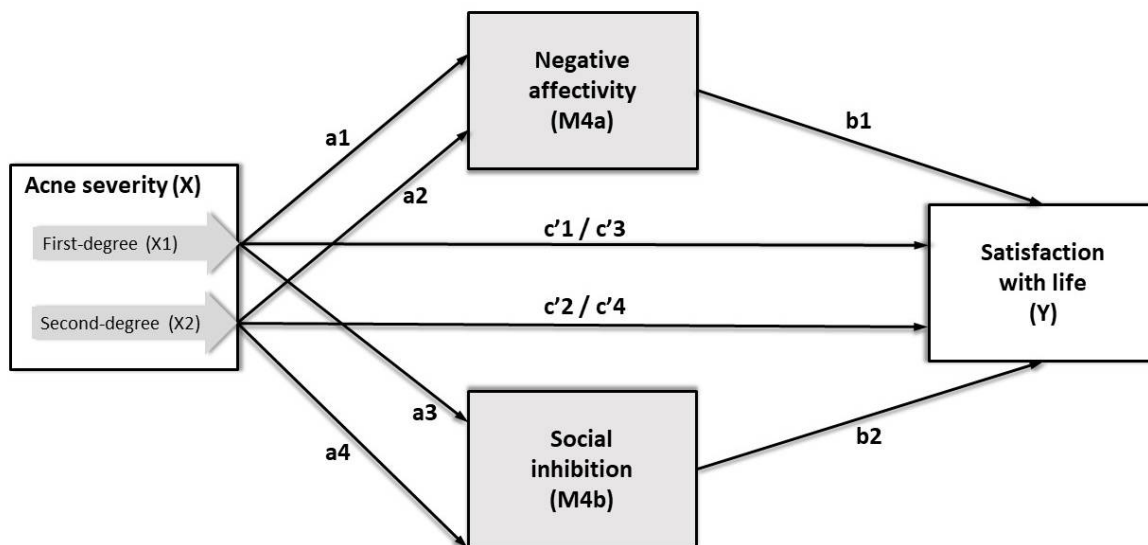

Figure S4. Study Model 4.

### STUDY MODEL 4a

**Negative Affectivity as a mediator**

\*\*\*\*\* PROCESS Procedure for SPSS Version 3.4.1 \*\*\*\*\*

Written by Andrew F. Hayes, Ph.D. [www.afhayes.com](http://www.afhayes.com)

Documentation available in Hayes (2018). [www.guilford.com/p/hayes3](http://www.guilford.com/p/hayes3)

\*\*\*\*\*

Model : 4

Y : SWLS

X : HVS

M : DS14\_NE

Sample Size: 300

Coding of categorical X variable for analysis:

HVS X1 X2

.000 .000 .000

1.000 1.000 .000

2.000 .000 1.000

\*\*\*\*\*

## OUTCOME VARIABLE: DS14\_NE

| Model Summary |      |        |        |       |         |      |
|---------------|------|--------|--------|-------|---------|------|
| R             | R-sq | MSE    | F      | df1   | df2     | p    |
| .468          | .219 | 30.469 | 41.711 | 2.000 | 297.000 | .000 |

  

| Model    |        |      |        |      |        |        |
|----------|--------|------|--------|------|--------|--------|
|          | coeff  | se   | t      | p    | LLCI   | ULCI   |
| constant | 11.880 | .451 | 26.359 | .000 | 10.993 | 12.767 |
| X1       | 5.412  | .721 | 7.501  | .000 | 3.992  | 6.832  |
| X2       | 6.435  | .876 | 7.346  | .000 | 4.711  | 8.159  |

## Standardized coefficients

|    | coeff |
|----|-------|
| X1 | .869  |
| X2 | 1.033 |

## Covariance matrix of regression parameter estimates:

|          | constant | X1    | X2    |
|----------|----------|-------|-------|
| constant | .203     | -.203 | -.203 |
| X1       | -.203    | .521  | .203  |
| X2       | -.203    | .203  | .767  |

\*\*\*\*\*

## OUTCOME VARIABLE: SWLS

| Model Summary |      |        |        |       |         |      |
|---------------|------|--------|--------|-------|---------|------|
| R             | R-sq | MSE    | F      | df1   | df2     | p    |
| .418          | .175 | 39.195 | 20.864 | 3.000 | 296.000 | .000 |

  

| Model    |        |       |        |      |        |        |
|----------|--------|-------|--------|------|--------|--------|
|          | coeff  | se    | t      | p    | LLCI   | ULCI   |
| constant | 25.065 | .934  | 26.833 | .000 | 23.227 | 26.904 |
| X1       | -1.983 | .892  | -2.222 | .027 | -3.739 | -.226  |
| X2       | -4.071 | 1.080 | -3.769 | .000 | -6.196 | -1.945 |
| DS14_NE  | -.294  | .066  | -4.467 | .000 | -.423  | -.164  |

## Standardized coefficients

|         | coeff |
|---------|-------|
| X1      | -.289 |
| X2      | -.594 |
| DS14_NE | -.267 |

## Covariance matrix of regression parameter estimates:

|          | constant | X1    | X2    | DS14_NE |
|----------|----------|-------|-------|---------|
| constant | .873     | .017  | .070  | -.051   |
| X1       | .017     | .796  | .412  | -.023   |
| X2       | .070     | .412  | 1.166 | -.028   |
| DS14_NE  | -.051    | -.023 | -.028 | .004    |

## Test(s) of X by M interaction:

| F    | df1   | df2     | p    |
|------|-------|---------|------|
| .730 | 2.000 | 294.000 | .483 |

\*\*\*\*\* TOTAL EFFECT MODEL \*\*\*\*\*  
 OUTCOME VARIABLE: SWLS

Model Summary

| R    | R-sq | MSE    | F      | df1   | df2     | p    |
|------|------|--------|--------|-------|---------|------|
| .345 | .119 | 41.695 | 20.042 | 2.000 | 297.000 | .000 |

  

|          | coeff  | se    | t      | p    | LLCI   | ULCI   |
|----------|--------|-------|--------|------|--------|--------|
| constant | 21.573 | .527  | 40.918 | .000 | 20.536 | 22.611 |
| X1       | -3.573 | .844  | -4.234 | .000 | -5.234 | -1.912 |
| X2       | -5.962 | 1.025 | -5.818 | .000 | -7.979 | -3.946 |

Standardized coefficients

|    | coeff |
|----|-------|
| X1 | -.521 |
| X2 | -.870 |

Covariance matrix of regression parameter estimates:

|          | constant | X1    | X2    |
|----------|----------|-------|-------|
| constant | .278     | -.278 | -.278 |
| X1       | -.278    | .712  | .278  |
| X2       | -.278    | .278  | 1.050 |

\*\*\*\*\* TOTAL, DIRECT, AND INDIRECT EFFECTS OF X ON Y \*\*\*\*\*

Relative total effects of X on Y:

|    | Effect | se    | t      | p    | LLCI   | ULCI   | c_ps  |
|----|--------|-------|--------|------|--------|--------|-------|
| X1 | -3.573 | .844  | -4.234 | .000 | -5.234 | -1.912 | -.521 |
| X2 | -5.962 | 1.025 | -5.818 | .000 | -7.979 | -3.946 | -.870 |

Omnibus test of total effect of X on Y:

| R2-chng | F      | df1   | df2     | p    |
|---------|--------|-------|---------|------|
| .119    | 20.042 | 2.000 | 297.000 | .000 |

Relative direct effects of X on Y

|    | Effect | se    | t      | p    | LLCI   | ULCI   | c'_ps |
|----|--------|-------|--------|------|--------|--------|-------|
| X1 | -1.983 | .892  | -2.222 | .027 | -3.739 | -.226  | -.289 |
| X2 | -4.071 | 1.080 | -3.769 | .000 | -6.196 | -1.945 | -.594 |

Omnibus test of direct effect of X on Y:

| R2-chng | F     | df1   | df2     | p    |
|---------|-------|-------|---------|------|
| .041    | 7.331 | 2.000 | 296.000 | .001 |

Relative indirect effects of X on Y: HVS -> DS14\_NE -> SWLS

|    | Effect | BootSE | BootLLCI | BootULCI |
|----|--------|--------|----------|----------|
| X1 | -1.591 | .435   | -2.447   | -.724    |
| X2 | -1.892 | .551   | -2.993   | -.821    |

Partially standardized relative indirect effect(s) of X on Y: HVS -> DS14\_NE -> SWLS

|    | Effect | BootSE | BootLLCI | BootULCI |
|----|--------|--------|----------|----------|
| X1 | -.232  | .062   | -.352    | -.108    |
| X2 | -.276  | .078   | -.430    | -.121    |

\*\*\*\*\*

\*\*\*\*\* BOOTSTRAP RESULTS FOR REGRESSION MODEL PARAMETERS \*\*\*\*\*

OUTCOME VARIABLE: DS14\_NE

|          | Coeff  | BootMean | BootSE | BootLLCI | BootULCI |
|----------|--------|----------|--------|----------|----------|
| constant | 11.880 | 11.881   | .531   | 10.831   | 12.911   |
| X1       | 5.412  | 5.407    | .706   | 3.997    | 6.761    |
| X2       | 6.435  | 6.436    | .743   | 4.972    | 7.890    |

-----

OUTCOME VARIABLE: SWLS

|          | Coeff  | BootMean | BootSE | BootLLCI | BootULCI |
|----------|--------|----------|--------|----------|----------|
| constant | 25.065 | 25.053   | 1.125  | 22.771   | 27.271   |
| X1       | -1.983 | -2.018   | .906   | -3.827   | -.273    |
| X2       | -4.071 | -4.087   | 1.078  | -6.188   | -1.956   |
| DS14_NE  | -.294  | -.292    | .080   | -.448    | -.131    |

\*\*\*\*\* ANALYSIS NOTES AND ERRORS \*\*\*\*\*

Level of confidence for all confidence intervals in output: 95.0000

Number of bootstrap samples for percentile bootstrap confidence intervals: 10000

NOTE: Standardized coefficients for dichotomous or multicategorical X are in partially standardized form.

## STUDY MODEL 4b

### Social Inhibition as a mediator

\*\*\*\*\* PROCESS Procedure for SPSS Version 3.4.1 \*\*\*\*\*

Written by Andrew F. Hayes, Ph.D. [www.afhayes.com](http://www.afhayes.com)

Documentation available in Hayes (2018). [www.guilford.com/p/hayes3](http://www.guilford.com/p/hayes3)

\*\*\*\*\*

Model : 4

Y : SWLS

X : HVS

M : DS14\_SI

Sample Size: 300

Coding of categorical X variable for analysis:

HVS X1 X2

.000 .000 .000

1.000 1.000 .000

2.000 .000 1.000

\*\*\*\*\*

OUTCOME VARIABLE: DS14\_SI

Model Summary

| R    | R-sq | MSE    | F      | df1   | df2     | p    |
|------|------|--------|--------|-------|---------|------|
| .461 | .213 | 27.010 | 40.128 | 2.000 | 297.000 | .000 |

Model

|          | coeff | se   | t      | p    | LLCI  | ULCI  |
|----------|-------|------|--------|------|-------|-------|
| constant | 8.507 | .424 | 20.047 | .000 | 7.672 | 9.342 |
| X1       | 4.743 | .679 | 6.983  | .000 | 3.407 | 6.080 |
| X2       | 6.234 | .825 | 7.559  | .000 | 4.611 | 7.857 |

Standardized coefficients

|    | coeff |
|----|-------|
| X1 | .813  |
| X2 | 1.068 |

Covariance matrix of regression parameter estimates:

|          | constant | X1    | X2    |
|----------|----------|-------|-------|
| constant | .180     | -.180 | -.180 |
| X1       | -.180    | .461  | .180  |
| X2       | -.180    | .180  | .680  |

\*\*\*\*\*

OUTCOME VARIABLE: SWLS

Model Summary

| R    | R-sq | MSE    | F      | df1   | df2     | p    |
|------|------|--------|--------|-------|---------|------|
| .429 | .184 | 38.743 | 22.256 | 3.000 | 296.000 | .000 |

Model

|          | coeff  | se    | t      | p    | LLCI   | ULCI   |
|----------|--------|-------|--------|------|--------|--------|
| constant | 24.447 | .780  | 31.358 | .000 | 22.913 | 25.981 |
| X1       | -1.971 | .878  | -2.245 | .025 | -3.698 | -.243  |
| X2       | -3.856 | 1.079 | -3.575 | .000 | -5.979 | -1.733 |
| DS14_SI  | -.338  | .069  | -4.861 | .000 | -.475  | -.201  |

Standardized coefficients

|         | coeff |
|---------|-------|
| X1      | -.287 |
| X2      | -.562 |
| DS14_SI | -.288 |

Covariance matrix of regression parameter estimates:

|          | constant | X1    | X2    | DS14_SI |
|----------|----------|-------|-------|---------|
| constant | .608     | -.063 | -.002 | -.041   |
| X1       | -.063    | .771  | .401  | -.023   |
| X2       | -.002    | .401  | 1.163 | -.030   |
| DS14_SI  | -.041    | -.023 | -.030 | .005    |

Test(s) of X by M interaction:

| F     | df1   | df2     | p    |
|-------|-------|---------|------|
| 2.273 | 2.000 | 294.000 | .105 |

\*\*\*\*\* TOTAL EFFECT MODEL \*\*\*\*\*

OUTCOME VARIABLE: SWLS

Model Summary

| R    | R-sq | MSE    | F      | df1   | df2     | p    |
|------|------|--------|--------|-------|---------|------|
| .345 | .119 | 41.695 | 20.042 | 2.000 | 297.000 | .000 |

Model

|          | Coeff  | se    | t      | p    | LLCI   | ULCI   |
|----------|--------|-------|--------|------|--------|--------|
| constant | 21.573 | .527  | 40.918 | .000 | 20.536 | 22.611 |
| X1       | -3.573 | .844  | -4.234 | .000 | -5.234 | -1.912 |
| X2       | -5.962 | 1.025 | -5.818 | .000 | -7.979 | -3.946 |

Standardized coefficients

|    | coeff |
|----|-------|
| X1 | -.521 |
| X2 | -.870 |

Covariance matrix of regression parameter estimates:

|          | constant | X1    | X2    |
|----------|----------|-------|-------|
| constant | .278     | -.278 | -.278 |
| X1       | -.278    | .712  | .278  |
| X2       | -.278    | .278  | 1.050 |

\*\*\*\*\* TOTAL, DIRECT, AND INDIRECT EFFECTS OF X ON Y \*\*\*\*\*

Relative total effects of X on Y:

|    | Effect | se    | t      | p    | LLCI   | ULCI   | c_ps  |
|----|--------|-------|--------|------|--------|--------|-------|
| X1 | -3.573 | .844  | -4.234 | .000 | -5.234 | -1.912 | -.521 |
| X2 | -5.962 | 1.025 | -5.818 | .000 | -7.979 | -3.946 | -.870 |

Omnibus test of total effect of X on Y:

| R2-chng | F      | df1   | df2     | p    |
|---------|--------|-------|---------|------|
| .119    | 20.042 | 2.000 | 297.000 | .000 |

-----

Relative direct effects of X on Y

|    | Effect | se    | t      | p    | LLCI   | ULCI   | c'_ps |
|----|--------|-------|--------|------|--------|--------|-------|
| X1 | -1.971 | .878  | -2.245 | .025 | -3.698 | -.243  | -.287 |
| X2 | -3.856 | 1.079 | -3.575 | .000 | -5.979 | -1.733 | -.562 |

Omnibus test of direct effect of X on Y:

| R2-chng | F     | df1   | df2     | p    |
|---------|-------|-------|---------|------|
| .037    | 6.716 | 2.000 | 296.000 | .001 |

-----

Relative indirect effects of X on Y: HVS -> DS14\_SI -> SWLS

Effect BootSE BootLLCI BootULCI

|    |        |      |        |        |
|----|--------|------|--------|--------|
| X1 | -1.602 | .431 | -2.541 | -.834  |
| X2 | -2.106 | .585 | -3.367 | -1.079 |

Partially standardized relative indirect effect(s) of X on Y: HVS -> DS14\_SI -> SWLS

Effect BootSE BootLLCI BootULCI

|    |       |      |       |       |
|----|-------|------|-------|-------|
| X1 | -.234 | .061 | -.366 | -.125 |
| X2 | -.307 | .082 | -.482 | -.160 |

\*\*\*\*\*

\*\*\*\*\* BOOTSTRAP RESULTS FOR REGRESSION MODEL PARAMETERS \*\*\*\*\*

OUTCOME VARIABLE: DS14\_SI

Coeff BootMean BootSE BootLLCI BootULCI

|          |       |       |      |       |       |
|----------|-------|-------|------|-------|-------|
| constant | 8.507 | 8.503 | .470 | 7.586 | 9.429 |
| X1       | 4.743 | 4.750 | .662 | 3.440 | 6.058 |
| X2       | 6.234 | 6.232 | .815 | 4.619 | 7.811 |

-----

OUTCOME VARIABLE: SWLS  
 Coeff BootMean BootSE BootLLCI BootULCI

|          |        |        |       |        |        |
|----------|--------|--------|-------|--------|--------|
| constant | 24.447 | 24.447 | .810  | 22.815 | 26.018 |
| X1       | -1.971 | -1.975 | .905  | -3.733 | -.183  |
| X2       | -3.856 | -3.838 | 1.083 | -5.929 | -1.636 |
| DS14_SI  | -.338  | -.338  | .075  | -.484  | -.193  |

\*\*\*\*\* ANALYSIS NOTES AND ERRORS \*\*\*\*\*

Level of confidence for all confidence intervals in output: 95.0000  
 Number of bootstrap samples for percentile bootstrap confidence intervals: 10000  
 NOTE: Standardized coefficients for dichotomous or multicategorical X are in partially standardized form.

### STUDY MODEL 5

**Mediation effect of Negative Affectivity and Social Inhibition as two subcomponents of Type D personality on the relationship between acne severity and satisfaction with life: An additive approach**

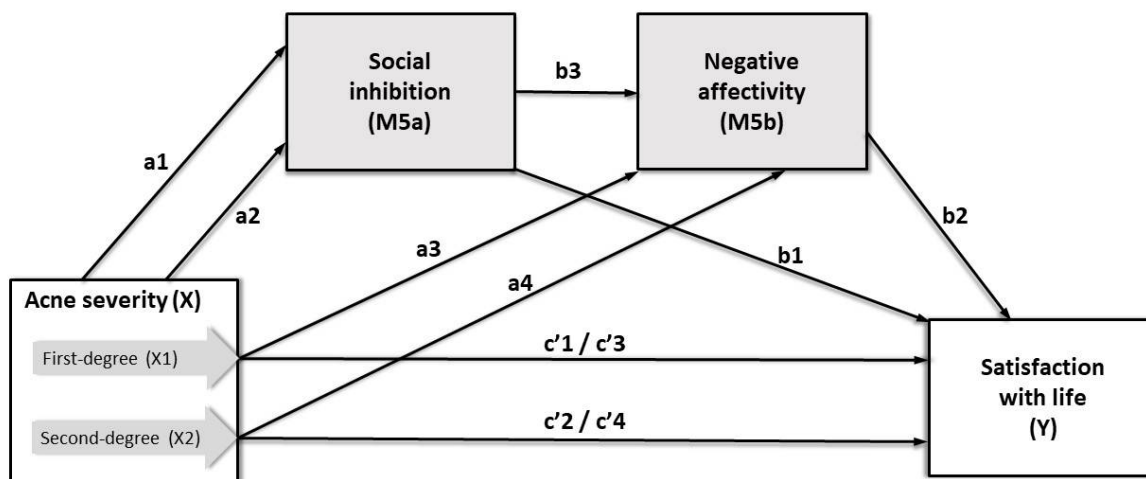

Figure S5. Study Model 5.

\*\*\*\*\* PROCESS Procedure for SPSS Version 3.4.1 \*\*\*\*\*

Written by Andrew F. Hayes, Ph.D. [www.afhayes.com](http://www.afhayes.com)  
 Documentation available in Hayes (2018). [www.guilford.com/p/hayes3](http://www.guilford.com/p/hayes3)

\*\*\*\*\*

Model : 6  
 Y : SWLS  
 X : HVS  
 M1 : DS14\_SI  
 M2 : DS14\_NE  
 Sample Size: 300  
 Coding of categorical X variable for analysis:  
 HVS X1 X2  
 .000 .000 .000  
 1.000 1.000 .000  
 2.000 .000 1.000

\*\*\*\*\*



## OUTCOME VARIABLE: DS14\_SI

| Model Summary |      |        |        |       |         |      |
|---------------|------|--------|--------|-------|---------|------|
| R             | R-sq | MSE    | F      | df1   | df2     | p    |
| .461          | .213 | 27.010 | 40.128 | 2.000 | 297.000 | .000 |

  

| Model    |       |      |        |      |       |       |
|----------|-------|------|--------|------|-------|-------|
|          | coeff | se   | t      | p    | LLCI  | ULCI  |
| constant | 8.507 | .424 | 20.047 | .000 | 7.672 | 9.342 |
| X1       | 4.743 | .679 | 6.983  | .000 | 3.407 | 6.080 |
| X2       | 6.234 | .825 | 7.559  | .000 | 4.611 | 7.857 |

## Standardized coefficients

|    | coeff |
|----|-------|
| X1 | .813  |
| X2 | 1.068 |

## Covariance matrix of regression parameter estimates:

|          | constant | X1    | X2    |
|----------|----------|-------|-------|
| constant | .180     | -.180 | -.180 |
| X1       | -.180    | .461  | .180  |
| X2       | -.180    | .180  | .680  |

\*\*\*\*\*

## OUTCOME VARIABLE: DS14\_NE

| Model Summary |      |        |        |       |         |      |
|---------------|------|--------|--------|-------|---------|------|
| R             | R-sq | MSE    | F      | df1   | df2     | p    |
| .619          | .383 | 24.165 | 61.224 | 3.000 | 296.000 | .000 |

  

| Model    |       |      |        |      |       |       |
|----------|-------|------|--------|------|-------|-------|
|          | coeff | se   | t      | p    | LLCI  | ULCI  |
| constant | 7.744 | .616 | 12.577 | .000 | 6.532 | 8.955 |
| X1       | 3.105 | .693 | 4.479  | .000 | 1.741 | 4.470 |
| X2       | 3.404 | .852 | 3.995  | .000 | 1.727 | 5.080 |
| DS14_SI  | .486  | .055 | 8.859  | .000 | .378  | .594  |

## Standardized coefficients

|         | coeff |
|---------|-------|
| X1      | .499  |
| X2      | .547  |
| DS14_SI | .456  |

## Covariance matrix of regression parameter estimates:

|          | constant | X1    | X2    | DS14_SI |
|----------|----------|-------|-------|---------|
| constant | .379     | -.040 | -.001 | -.026   |
| X1       | -.040    | .481  | .250  | -.014   |
| X2       | -.001    | .250  | .726  | -.019   |
| DS14_SI  | -.026    | -.014 | -.019 | .003    |

## Test(s) of X by M interaction:

|      | F    | df1   | df2     | p    |
|------|------|-------|---------|------|
| M1*X | .984 | 2.000 | 294.000 | .375 |

\*\*\*\*\*

## OUTCOME VARIABLE: SWLS

| Model Summary |      |        |        |       |         |      |
|---------------|------|--------|--------|-------|---------|------|
| R             | R-sq | MSE    | F      | df1   | df2     | p    |
| .449          | .202 | 38.021 | 18.666 | 4.000 | 295.000 | .000 |

  

| Model    |        |       |        |      |        |        |
|----------|--------|-------|--------|------|--------|--------|
|          | coeff  | se    | t      | p    | LLCI   | ULCI   |
| constant | 25.900 | .957  | 27.074 | .000 | 24.018 | 27.783 |
| X1       | -1.388 | .899  | -1.545 | .123 | -3.157 | .380   |
| X2       | -3.217 | 1.097 | -2.933 | .004 | -5.376 | -1.059 |
| DS14_SI  | -.247  | .077  | -3.184 | .002 | -.399  | -.094  |
| DS14_NE  | -.188  | .073  | -2.574 | .011 | -.331  | -.044  |

## Standardized coefficients

|         | coeff |
|---------|-------|
| X1      | -.202 |
| X2      | -.469 |
| DS14_SI | -.210 |
| DS14_NE | -.170 |

## Covariance matrix of regression parameter estimates:

|          | constant | X1    | X2    | DS14_SI | DS14_NE |
|----------|----------|-------|-------|---------|---------|
| constant | .915     | .066  | .138  | -.020   | -.041   |
| X1       | .066     | .807  | .450  | -.014   | -.017   |
| X2       | .138     | .450  | 1.203 | -.021   | -.018   |
| DS14_SI  | -.020    | -.014 | -.021 | .006    | -.003   |
| DS14_NE  | -.041    | -.017 | -.018 | -.003   | .005    |

## Test(s) of X by M interaction:

|      | F     | df1   | df2     | p    |
|------|-------|-------|---------|------|
| M1*X | 2.810 | 2.000 | 293.000 | .062 |
| M2*X | 1.155 | 2.000 | 293.000 | .317 |

\*\*\*\*\* TOTAL EFFECT MODEL \*\*\*\*\*

## OUTCOME VARIABLE: SWLS

| Model Summary |      |        |        |       |         |      |
|---------------|------|--------|--------|-------|---------|------|
| R             | R-sq | MSE    | F      | df1   | df2     | p    |
| .345          | .119 | 41.695 | 20.042 | 2.000 | 297.000 | .000 |

  

| Model    |        |       |        |      |        |        |
|----------|--------|-------|--------|------|--------|--------|
|          | coeff  | se    | t      | p    | LLCI   | ULCI   |
| constant | 21.573 | .527  | 40.918 | .000 | 20.536 | 22.611 |
| X1       | -3.573 | .844  | -4.234 | .000 | -5.234 | -1.912 |
| X2       | -5.962 | 1.025 | -5.818 | .000 | -7.979 | -3.946 |

## Standardized coefficients

|    | coeff |
|----|-------|
| X1 | -.521 |
| X2 | -.870 |

## Covariance matrix of regression parameter estimates:

|          | constant | X1    | X2    |
|----------|----------|-------|-------|
| constant | .278     | -.278 | -.278 |
| X1       | -.278    | .712  | .278  |
| X2       | -.278    | .278  | 1.050 |

## \*\*\*\*\* TOTAL, DIRECT, AND INDIRECT EFFECTS OF X ON Y \*\*\*\*\*

## Relative total effects of X on Y:

|    | Effect | se    | t      | p    | LLCI   | ULCI   | c_ps  |
|----|--------|-------|--------|------|--------|--------|-------|
| X1 | -3.573 | .844  | -4.234 | .000 | -5.234 | -1.912 | -.521 |
| X2 | -5.962 | 1.025 | -5.818 | .000 | -7.979 | -3.946 | -.870 |

## Omnibus test of total effect of X on Y:

| R2-chng | F      | df1   | df2     | p    |
|---------|--------|-------|---------|------|
| .119    | 20.042 | 2.000 | 297.000 | .000 |

-----

## Relative direct effects of X on Y

|    | Effect | se    | t      | p    | LLCI   | ULCI   | c'_ps |
|----|--------|-------|--------|------|--------|--------|-------|
| X1 | -1.388 | .899  | -1.545 | .123 | -3.157 | .380   | -.202 |
| X2 | -3.217 | 1.097 | -2.933 | .004 | -5.376 | -1.059 | -.469 |

## Omnibus test of direct effect of X on Y:

| R2-chng | F     | df1   | df2     | p    |
|---------|-------|-------|---------|------|
| .023    | 4.328 | 2.000 | 295.000 | .014 |

-----

## Relative indirect effects of X on Y:

| HVS | -> | DS14_SI | ->     | SWLS     |          |
|-----|----|---------|--------|----------|----------|
|     |    | Effect  | BootSE | BootLLCI | BootULCI |
| X1  |    | -1.170  | .433   | -2.114   | -.413    |
| X2  |    | -1.537  | .572   | -2.779   | -.540    |

| HVS | -> | DS14_NE | ->     | SWLS     |          |
|-----|----|---------|--------|----------|----------|
|     |    | Effect  | BootSE | BootLLCI | BootULCI |
| X1  |    | -.583   | .271   | -1.137   | -.055    |
| X2  |    | -.639   | .309   | -1.275   | -.056    |

| HVS | -> | DS14_SI | ->     | DS14_NE  | ->       | SWLS |
|-----|----|---------|--------|----------|----------|------|
|     |    | Effect  | BootSE | BootLLCI | BootULCI |      |
| X1  |    | -.433   | .208   | -.869    | -.037    |      |
| X2  |    | -.569   | .281   | -1.145   | -.046    |      |

## Partially standardized relative indirect effect(s) of X on Y:

| HVS | -> | DS14_SI | ->     | SWLS     |          |
|-----|----|---------|--------|----------|----------|
|     |    | Effect  | BootSE | BootLLCI | BootULCI |
| X1  |    | -.171   | .062   | -.305    | -.061    |
| X2  |    | -.224   | .082   | -.401    | -.080    |

| HVS | -> | DS14_NE | ->     | SWLS     |          |
|-----|----|---------|--------|----------|----------|
|     |    | Effect  | BootSE | BootLLCI | BootULCI |
| X1  |    | -.085   | .040   | -.165    | -.008    |

X2    -.093    .045    -.187    -.008

HVS    -> DS14\_SI    -> DS14\_NE    -> SWLS  
           Effect BootSE BootLLCI BootULCI  
 X1    -.063    .030    -.125    -.005  
 X2    -.083    .041    -.166    -.007

\*\*\*\*\*

\*\*\*\*\* BOOTSTRAP RESULTS FOR REGRESSION MODEL PARAMETERS \*\*\*\*\*

OUTCOME VARIABLE: DS14\_SI

|          | Coeff | BootMean | BootSE | BootLLCI | BootULCI |
|----------|-------|----------|--------|----------|----------|
| constant | 8.507 | 8.512    | .459   | 7.604    | 9.408    |
| X1       | 4.743 | 4.743    | .661   | 3.419    | 6.007    |
| X2       | 6.234 | 6.236    | .810   | 4.639    | 7.811    |

-----

OUTCOME VARIABLE: DS14\_NE

|          | Coeff | BootMean | BootSE | BootLLCI | BootULCI |
|----------|-------|----------|--------|----------|----------|
| constant | 7.744 | 7.746    | .712   | 6.337    | 9.166    |
| X1       | 3.105 | 3.111    | .693   | 1.745    | 4.477    |
| X2       | 3.404 | 3.409    | .682   | 2.091    | 4.784    |
| DS14_SI  | .486  | .486     | .057   | .374     | .597     |

-----

OUTCOME VARIABLE: SWLS

|          | Coeff  | BootMean | BootSE | BootLLCI | BootULCI |
|----------|--------|----------|--------|----------|----------|
| constant | 25.900 | 25.890   | 1.117  | 23.692   | 28.054   |
| X1       | -1.388 | -1.383   | .937   | -3.242   | .439     |
| X2       | -3.217 | -3.198   | 1.146  | -5.426   | -.950    |
| DS14_SI  | -.247  | -.247    | .078   | -.403    | -.095    |
| DS14_NE  | -.188  | -.187    | .085   | -.351    | -.016    |

\*\*\*\*\* ANALYSIS NOTES AND ERRORS \*\*\*\*\*

Level of confidence for all confidence intervals in output: 95.0000

Number of bootstrap samples for percentile bootstrap confidence intervals: 10000

NOTE: Standardized coefficients for dichotomous or multicategorical X are in partially standardized form.

### STUDY MODEL 6

**Moderation mediation effect of interaction between Negative Affectivity and Social Inhibition on the relationship between acne severity and satisfaction with life: A synergistic approach**

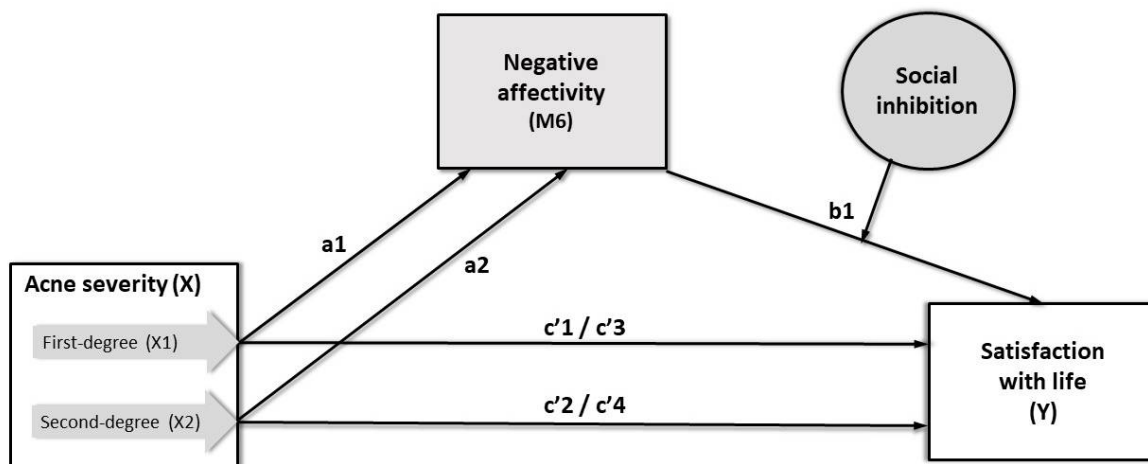

Figure S6. Study Model 6.

\*\*\*\*\* PROCESS Procedure for SPSS Version 3.4.1 \*\*\*\*\*

Written by Andrew F. Hayes, Ph.D. [www.afhayes.com](http://www.afhayes.com)

Documentation available in Hayes (2018). [www.guilford.com/p/hayes3](http://www.guilford.com/p/hayes3)

\*\*\*\*\*

Model : 14

Y : SWLS

X : HVS

M : DS14\_NE

W : DS14\_SI

Sample Size: 300

Coding of categorical X variable for analysis:

HVS X1 X2

.000 .000 .000

1.000 1.000 .000

2.000 .000 1.000

\*\*\*\*\*

OUTCOME VARIABLE: DS14\_NE

#### Model Summary

| R    | R-sq | MSE    | F      | df1   | df2     | p    |
|------|------|--------|--------|-------|---------|------|
| .468 | .219 | 30.469 | 41.711 | 2.000 | 297.000 | .000 |

#### Model

|          | coeff  | se   | t      | p    | LLCI   | ULCI   |
|----------|--------|------|--------|------|--------|--------|
| constant | -2.890 | .451 | -6.412 | .000 | -3.777 | -2.003 |
| X1       | 5.412  | .721 | 7.501  | .000 | 3.992  | 6.832  |
| X2       | 6.435  | .876 | 7.346  | .000 | 4.711  | 8.159  |

Covariance matrix of regression parameter estimates:

|          | constant | X1    | X2    |
|----------|----------|-------|-------|
| constant | .203     | -.203 | -.203 |
| X1       | -.203    | .521  | .203  |
| X2       | -.203    | .203  | .767  |

\*\*\*\*\*

OUTCOME VARIABLE: SWLS

Model Summary

| R    | R-sq | MSE    | F      | df1   | df2     | p    |
|------|------|--------|--------|-------|---------|------|
| .450 | .202 | 38.144 | 14.894 | 5.000 | 294.000 | .000 |

Model

|          | coeff  | se    | t      | p    | LLCI   | ULCI   |
|----------|--------|-------|--------|------|--------|--------|
| constant | 20.326 | .604  | 33.669 | .000 | 19.138 | 21.514 |
| X1       | -1.367 | .906  | -1.509 | .132 | -3.149 | .416   |
| X2       | -3.225 | 1.099 | -2.934 | .004 | -5.389 | -1.062 |
| DS14_NE  | -.184  | .075  | -2.438 | .015 | -.332  | -.035  |
| DS14_SI  | -.250  | .079  | -3.156 | .002 | -.406  | -.094  |
| Int_1    | .002   | .011  | .216   | .829 | -.019  | .024   |

Product terms key:

Int\_1 : DS14\_NE x DS14\_SI

Covariance matrix of regression parameter estimates:

|          | constant | X1    | X2    | DS14_NE | DS14_SI | Int_1 |
|----------|----------|-------|-------|---------|---------|-------|
| constant | .364     | -.366 | -.352 | .004    | .012    | -.003 |
| X1       | -.366    | .820  | .448  | -.015   | -.016   | .001  |
| X2       | -.352    | .448  | 1.209 | -.019   | -.020   | .000  |
| DS14_NE  | .004     | -.015 | -.019 | .006    | -.003   | .000  |
| DS14_SI  | .012     | -.016 | -.020 | -.003   | .006    | .000  |
| Int_1    | -.003    | .001  | .000  | .000    | .000    | .000  |

Test(s) of X by M interaction:

| F     | df1   | df2     | p    |
|-------|-------|---------|------|
| 1.163 | 2.000 | 292.000 | .314 |

Test(s) of highest order unconditional interaction(s):

|     | R2-chng | F    | df1   | df2     | p    |
|-----|---------|------|-------|---------|------|
| M*W | .000    | .047 | 1.000 | 294.000 | .829 |

\*\*\*\*\* DIRECT AND INDIRECT EFFECTS OF X ON Y \*\*\*\*\*

Relative direct effects of X on Y

|    | Effect | se    | t      | p    | LLCI   | ULCI   |
|----|--------|-------|--------|------|--------|--------|
| X1 | -1.367 | .906  | -1.509 | .132 | -3.149 | .416   |
| X2 | -3.225 | 1.099 | -2.934 | .004 | -5.389 | -1.062 |

Omnibus test of direct effect of X on Y:

| R2-chng | F     | df1   | df2     | p    |
|---------|-------|-------|---------|------|
| .023    | 4.326 | 2.000 | 294.000 | .014 |

-----

Relative conditional indirect effects of X on Y:

INDIRECT EFFECT: HVS -> DS14\_NE -> SWLS

|    | DS14_SI | Effect | BootSE | BootLLCI | BootULCI |
|----|---------|--------|--------|----------|----------|
| X1 | -5.838  | -1.068 | .549   | -2.092   | .089     |
| X1 | .000    | -.994  | .463   | -1.857   | -.032    |
| X1 | 5.838   | -.920  | .667   | -2.196   | .458     |

Index of moderated mediation:

|         | Index | BootSE | BootLLCI | BootULCI |
|---------|-------|--------|----------|----------|
| DS14_SI | .013  | .068   | -.127    | .144     |

---

|    | DS14_SI | Effect | BootSE | BootLLCI | BootULCI |
|----|---------|--------|--------|----------|----------|
| X2 | -5.838  | -1.270 | .676   | -2.574   | .097     |
| X2 | .000    | -1.182 | .570   | -2.288   | -.039    |
| X2 | 5.838   | -1.094 | .799   | -2.634   | .526     |

Index of moderated mediation:

|         | Index | BootSE | BootLLCI | BootULCI |
|---------|-------|--------|----------|----------|
| DS14_SI | .015  | .081   | -.147    | .173     |

---

\*\*\*\*\*

\*\*\*\*\* BOOTSTRAP RESULTS FOR REGRESSION MODEL PARAMETERS \*\*\*\*\*

OUTCOME VARIABLE: DS14\_NE

|          | Coeff  | BootMean | BootSE | BootLLCI | BootULCI |
|----------|--------|----------|--------|----------|----------|
| constant | -2.890 | -2.889   | .518   | -3.916   | -1.891   |
| X1       | 5.412  | 5.414    | .703   | 4.011    | 6.776    |
| X2       | 6.435  | 6.424    | .747   | 4.979    | 7.884    |

-----

OUTCOME VARIABLE: SWLS

|          | Coeff  | BootMean | BootSE | BootLLCI | BootULCI |
|----------|--------|----------|--------|----------|----------|
| constant | 20.326 | 20.322   | .719   | 18.904   | 21.729   |
| X1       | -1.367 | -1.386   | .954   | -3.217   | .462     |
| X2       | -3.225 | -3.221   | 1.137  | -5.421   | -.973    |
| DS14_NE  | -.184  | -.180    | .086   | -.344    | -.006    |
| DS14_SI  | -.250  | -.252    | .083   | -.416    | -.090    |
| Int_1    | .002   | .003     | .013   | -.023    | .027     |

\*\*\*\*\* ANALYSIS NOTES AND ERRORS \*\*\*\*\*

Level of confidence for all confidence intervals in output: 95.0000

Number of bootstrap samples for percentile bootstrap confidence intervals: 10000

W values in conditional tables are the mean and +/- SD from the mean.

NOTE: The following variables were mean centered prior to analysis: DS14\_SI, DS14\_NE

NOTE: Standardized coefficients not available for models with moderators.
